# Supplementary material
Source: publisher site journal article supplement (https://cdn.jamanetwork.com/ama/content_public/journal/intemed/927427/ioi130057supp1_prod.pdf)
Supplement: Supplementary file 1 [file ioi130057supp1_prod.pdf]

## Supplementary Online Content

Jonas Karl Eriksson, Martin Neovius, Johan Bratt, Ingemar F. Petersson, Ronald F. van Vollenhoven; Pierre Geborek, Sofia Ernestam. Biological vs conventional combination treatment and work loss in early rheumatoid arthritis: a randomized trial. *JAMA Internal Medicine*. Published online July 1, 2013. doi:10.1001/jamainternmed.2013.7801.

**eFigure 1.** Time to discontinuation by randomly allocated drug.

**eFigure 2.** Flow Chart of the Swedish pharmacotherapy (Swefot) trial and number of patients by type of analysis in the present study.

**eFigure 3.** Monthly days on sick leave and disability pension in randomized and non-randomized patients.

This supplementary material has been provided by the authors to give readers additional information about their work.

## Drug Discontinuation

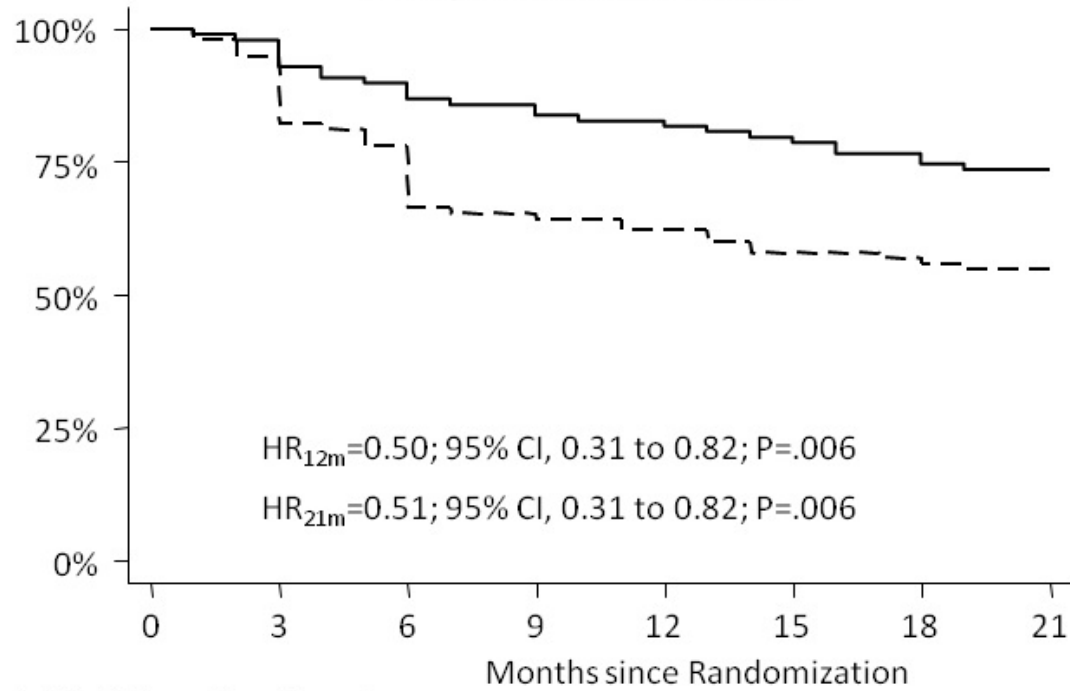

### Number at risk (Discontinuations)

|                              |    |     |    |      |    |      |    |     |    |     |    |     |    |     |    |
|------------------------------|----|-----|----|------|----|------|----|-----|----|-----|----|-----|----|-----|----|
| — Biologic treatment         | 98 | (2) | 96 | (8)  | 88 | (4)  | 84 | (3) | 81 | (3) | 78 | (3) | 75 | (3) | 72 |
| - - - Conventional treatment | 95 | (5) | 90 | (16) | 74 | (12) | 62 | (3) | 59 | (4) | 55 | (1) | 54 | (2) | 52 |

**eFigure 1** Time to discontinuation by randomly allocated drug

HR: Hazard ratio

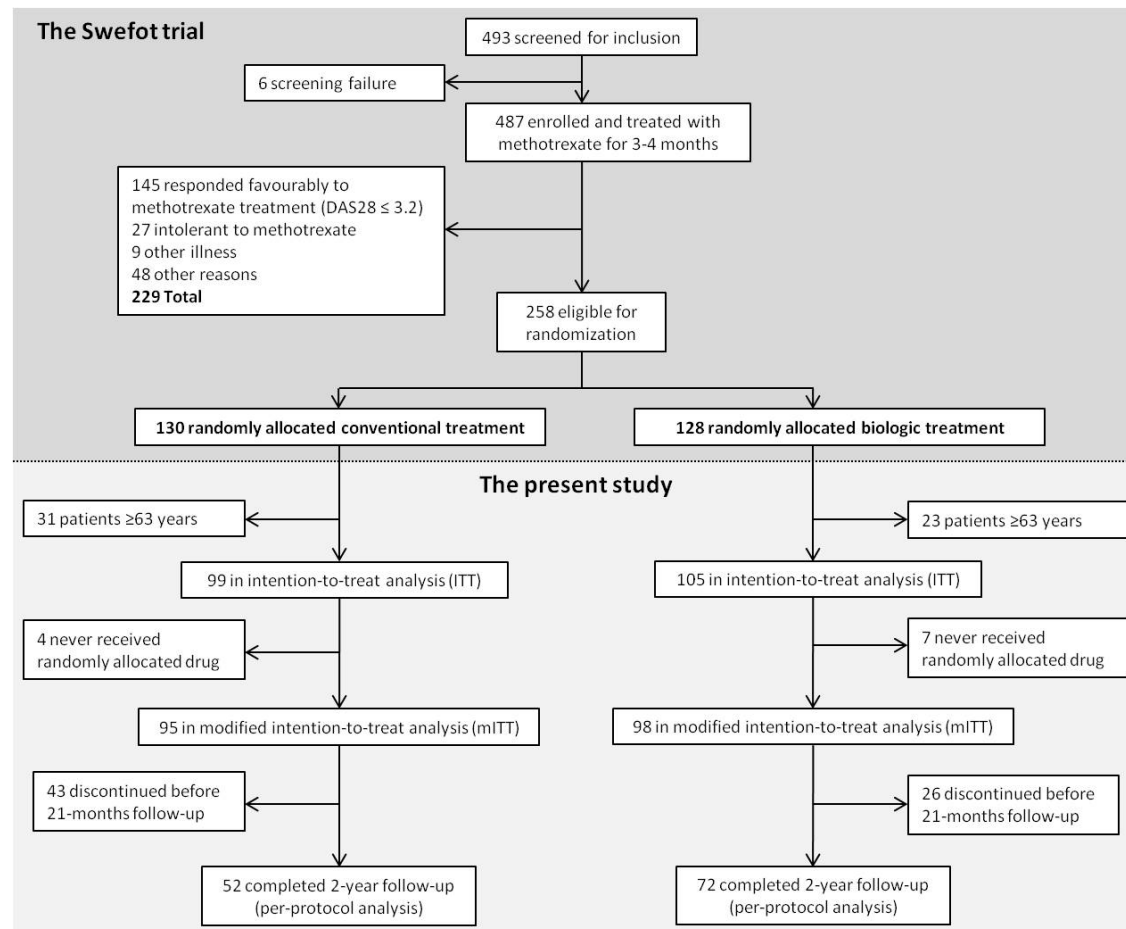

**eFigure 2** Flow chart of the Swedish pharmacotherapy (Swefot) trial and number of patients by type of analysis in the present study

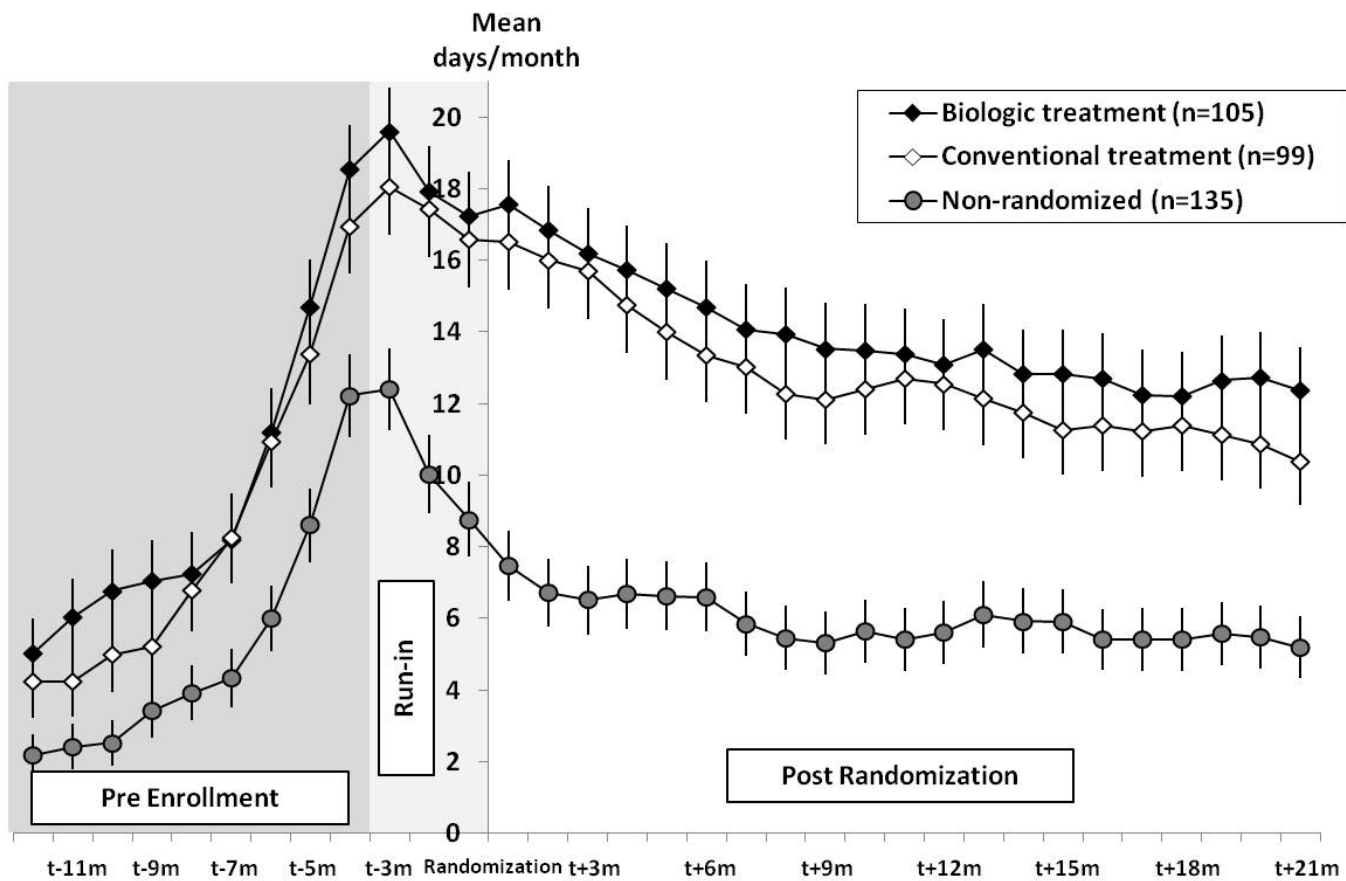

**eFigure 3** Mean monthly days (maximum 30 days) on sick leave and disability pension in relation to date of randomization for randomized and non-randomized patients

Run-in: Mono-therapy with methotrexate; Bars indicate standard errors

©2013 American Medical Association. All rights reserved.
